# Supplementary material for: Mit Apps gegen den Tinnitus? Ein systematisches Review zu Qualität, Interventionselementen und Techniken der Verhaltensänderung
Source: Springer Nature journal article supplement (doi:10.1007/s00103-023-03805-1), 2023-12-12
Supplement: MOESM1 [file 26517870]

**Zusätzliches Onlinematerial zum Beitrag:**

**„Mit Apps gegen den Tinnitus? - Ein systematisches Review zu Qualität, Interventionselementen und Techniken der Verhaltensänderung“**

**von Rinn et al.**

**(Bundesgesundheitsblatt, Heft 2/2024)**

**Onlinematerial 1:** Aufschlüsselung Screening-Kriterium a) zur Auswahl der Tinnitus-Apps

App nicht für Tinnitus entwickelt: Davon  $n = 112$  Apps mit Geräuschen bei Schlaflosigkeit, zur Förderung der Konzentration, zur Begleitung von Meditation / Yoga, zur Stressreduktion, bei Tinnitus;  $n = 17$  Apps zur Anpassung eines Hörgerätes, bietet Tinnitus-Signal oder –Programm;  $n = 19$  Apps, bei denen Tinnitus im Titel oder in der Beschreibung erwähnt wird (z.B. Informationen zu verschiedenen HNO-Erkrankungen, Frequenzgeneratoren, Anhören eines Tinnitus-Tons).

**Onlinematerial 2:** Aufschlüsselung der sonstigen Interventionselemente bei Tinnitus

Aufbau positiver Aktivitäten/ Verhaltensaktivierung ( $n = 3$ ); Stressmanagement-Training ( $n = 1$ ); Übungen aus Hörtherapie (Schulung des Richtungshörens, der Hörwahrnehmung,  $n = 1$ ); Abfrage von/ Fokus auf eigene Stärken und Erfolge ( $n = 1$ , als zentral eingeordnet); Förderung von Akzeptanz ( $n = 1$ , als zentral eingeordnet); Erfassung von Motiven/Bedürfnissen und Ableitung von Lebenszielen ( $n = 1$ ); Tinnituszentrierte Musiktherapie nach Cramer (TIM, laut zugehöriger Website) ( $n = 1$ , als zentral eingeordnet); Tracking von z.B. Stimmung, Stress, Konzentration (zusätzlich zu Erfassung von Tinnitus-Charakteristika sowie Belastung;  $n = 1$ , als zentral eingeordnet).

**Onlinematerial 3:** Interventionselemente aufgeschlüsselt für die einzelnen Apps.

| Interventionselement                                                                        | Relax Noise 3 – Tinnitus | Dr Mollin Tinnitus | Shades of Noise | TinniTrain | Tinnitus Notched Tunes | Tinnitus Relief App. Klangtherapie | White Noise for Sleep. Generator for Tinnitus | Tonal Tinnitus Therapy | Tinnitracks Tinnitus Therapie | ReSound Tinnitus Relief | Tinnitus DE | Widex Zen. Tinnitus Management | Kalmeda Tinnitus-App | tinnitus help | Tinnitus HQ | Track Your Tinnitus | Belstone Tinnitus Calmer | Starkey Relax | Tinnitus Masker | TINNITUS, WHITE NOISE, SCHLAF | UNITI Tinnitus Studie |
|---------------------------------------------------------------------------------------------|--------------------------|--------------------|-----------------|------------|------------------------|------------------------------------|-----------------------------------------------|------------------------|-------------------------------|-------------------------|-------------|--------------------------------|----------------------|---------------|-------------|---------------------|--------------------------|---------------|-----------------|-------------------------------|-----------------------|
| Informationen zu Tinnitus/ Psychoedukation                                                  |                          | ✓                  |                 |            |                        |                                    |                                               |                        | ✓                             | ✓                       | ✓           | ✓                              | ✓                    |               |             |                     | ✓                        | ✓             |                 |                               | ✓                     |
| Analyse von Risikofaktoren für die Tinnituserstehung                                        |                          |                    |                 |            |                        |                                    |                                               |                        | ✓                             | ✓                       |             | ✓                              | ✓                    |               |             | ✓                   | ✓                        | ✓             |                 |                               | ✓                     |
| Analyse von Einflussfaktoren auf die Entstehung und Aufrechterhaltung der Tinnitusbelastung |                          |                    |                 |            |                        |                                    |                                               |                        | ✓                             |                         |             | ✓                              | ✓                    |               |             |                     |                          |               |                 |                               | ✓                     |
| Informationen zu/ Prüfung des Vorliegens von weiteren otologischen Symptomen                |                          |                    |                 |            |                        |                                    |                                               |                        | ✓                             | ✓                       |             |                                | ✓                    |               |             |                     | ✓                        |               |                 |                               | ✓                     |
| Erfassung von Tinnitus-Charakteristika                                                      |                          |                    | ✓               | ✓          | ✓                      |                                    |                                               | ✓                      | ✓                             | ✓                       |             |                                | ✓                    | ✓             | ✓           | ✓                   | ✓                        |               | ✓               |                               | ✓                     |
| Erfassung der Belastung durch den Tinnitus                                                  |                          |                    | ✓               |            |                        |                                    |                                               |                        | ✓                             | ✓                       |             |                                | ✓                    |               |             | ✓                   | ✓                        |               |                 |                               | ✓                     |
| Informationen zur Intervention in Bezug auf                                                 |                          |                    |                 |            |                        |                                    |                                               |                        |                               |                         |             |                                |                      |               |             |                     |                          |               |                 |                               |                       |
| Ziel der Maßnahme                                                                           | ✓                        | ✓                  |                 |            | ✓                      |                                    |                                               | ✓                      | ✓                             | ✓                       | ✓           | ✓                              | ✓                    | ✓             | ✓           | ✓                   | ✓                        | ✓             |                 |                               | ✓                     |
| Informationen zu Unsicherheiten und zu fehlender Evidenz                                    |                          |                    |                 |            |                        |                                    |                                               | ✓                      |                               |                         |             |                                |                      |               |             |                     |                          |               |                 |                               |                       |
| Kosten                                                                                      | ✓                        | ✓                  | ✓               | ✓          | ✓                      | ✓                                  | ✓                                             | ✓                      | ✓                             | ✓                       | ✓           | ✓                              | ✓                    | ✓             | ✓           | ✓                   | ✓                        | ✓             | ✓               | ✓                             | ✓                     |
| Entspannungsverfahren                                                                       |                          |                    |                 |            |                        |                                    |                                               |                        | ✓                             | ✓                       |             | ✓                              | ✓                    |               |             |                     |                          |               |                 |                               | ✓                     |
| Achtsamkeitsübungen                                                                         |                          |                    |                 |            |                        |                                    |                                               |                        |                               | ✓                       |             |                                | ✓                    |               |             |                     |                          |               |                 |                               | ✓                     |
| Identifikation von dysfunktionalen Gedanken                                                 |                          |                    |                 |            |                        |                                    |                                               |                        | ✓                             | ✓                       |             |                                | ✓                    |               |             |                     |                          |               |                 |                               | ✓                     |
| Veränderung von dysfunktionalen Gedanken                                                    |                          |                    |                 |            |                        |                                    |                                               |                        | ✓                             | ✓                       |             |                                | ✓                    |               |             |                     |                          |               |                 |                               | ✓                     |
| Aufmerksamkeitslenkung                                                                      |                          |                    |                 |            |                        |                                    |                                               |                        | ✓                             |                         |             |                                |                      |               |             |                     |                          |               |                 |                               |                       |
| Konfrontation mit dem Tinnitus                                                              |                          |                    |                 |            |                        |                                    |                                               |                        |                               |                         |             |                                | ✓                    |               |             |                     |                          |               |                 |                               |                       |

Interventionselemente aufgeschlüsselt für  $n = 21$  untersuchte Apps. Aus Gründen der Lesbarkeit sind nur Elemente aufgeführt, die für mindestens eine App identifiziert wurden.

Fortsetzung **Onlinematerial 3**: Interventionselemente aufgeschlüsselt für die einzelnen Apps.

| Interventionselement                                              | Relax Noise 3 – Tinnitus | Dr Mollin Tinnitus | Shades of Noise | TinniTrain | Tinnitus Notched Tunes | Tinnitus Relief App. Klangtherapie | White Noise for Sleep. Generator for Tinnitus | Tonal Tinnitus Therapy | Tinnitracks Tinnitus Therapie | ReSound Tinnitus Relief | Tinnitus DE | Widex Zen. Tinnitus Management | Kalmeda Tinnitus-App | tinnitus help | Tinnitus HQ | Track Your Tinnitus | Beltone Tinnitus Calmer | Starkey Relax | Tinnitus Masker | TINNITUS, WHITE NOISE, SCHLAF | UNITI Tinnitus Studie |   |   |
|-------------------------------------------------------------------|--------------------------|--------------------|-----------------|------------|------------------------|------------------------------------|-----------------------------------------------|------------------------|-------------------------------|-------------------------|-------------|--------------------------------|----------------------|---------------|-------------|---------------------|-------------------------|---------------|-----------------|-------------------------------|-----------------------|---|---|
| Emotionsregulation                                                |                          |                    |                 |            |                        |                                    |                                               |                        |                               |                         |             |                                |                      |               |             |                     |                         |               |                 |                               |                       | ✓ |   |
| Soziale Unterstützung                                             |                          |                    |                 |            |                        |                                    |                                               |                        |                               |                         |             |                                |                      |               |             |                     |                         |               |                 |                               |                       |   | ✓ |
| Vermittlung von Hörtaktiken bei Hörminderung                      |                          |                    |                 |            |                        |                                    |                                               |                        | ✓                             |                         |             |                                |                      |               |             |                     |                         |               |                 |                               |                       |   | ✓ |
| Techniken zur Verbesserung des Schlafs                            |                          |                    |                 |            |                        |                                    |                                               |                        | ✓                             | ✓                       |             | ✓                              | ✓                    |               |             |                     |                         | ✓             |                 |                               |                       |   | ✓ |
| Techniken zur Verbesserung von Konzentration und Arbeitseffizienz |                          |                    |                 |            |                        |                                    |                                               |                        |                               |                         |             |                                |                      |               |             |                     |                         |               |                 |                               |                       |   | ✓ |
| Einsatz von Geräuschen                                            | ✓                        | ✓                  | ✓               |            | ✓                      | ✓                                  | ✓                                             | ✓                      |                               | ✓                       | ✓           | ✓                              | ✓                    | ✓             | ✓           |                     | ✓                       | ✓             | ✓               | ✓                             | ✓                     | ✓ | ✓ |
| Auditorisches Diskriminationstraining                             |                          |                    |                 | ✓          |                        |                                    |                                               |                        |                               |                         |             |                                |                      |               |             |                     |                         |               |                 |                               |                       |   |   |
| Frequenzmodulierte Musiktherapie                                  |                          |                    |                 |            | ✓                      |                                    |                                               |                        | ✓                             |                         |             |                                |                      |               | ✓           |                     |                         |               |                 |                               |                       |   |   |
| Akustische Neuromodulation                                        |                          |                    |                 |            |                        |                                    |                                               | ✓                      |                               |                         |             |                                |                      |               |             |                     |                         |               |                 |                               |                       |   |   |
| Rückfallprävention                                                |                          |                    |                 |            |                        |                                    |                                               |                        | ✓                             |                         |             |                                |                      |               |             |                     |                         |               |                 |                               |                       |   |   |
| Aufbau positiver Aktivitäten                                      |                          |                    |                 |            |                        |                                    |                                               |                        |                               | ✓                       |             |                                | ✓                    |               |             |                     | ✓                       |               |                 |                               |                       |   |   |
| Stressmanagement-Training                                         |                          |                    |                 |            |                        |                                    |                                               |                        | ✓                             |                         |             |                                |                      |               |             |                     |                         |               |                 |                               |                       |   |   |
| Übungen aus Hörtherapie                                           |                          |                    |                 |            |                        |                                    |                                               |                        |                               |                         |             |                                |                      |               |             |                     |                         |               |                 |                               |                       |   | ✓ |
| Abfrage von/ Fokus auf eigene Stärken und Erfolge                 |                          |                    |                 |            |                        |                                    |                                               |                        |                               |                         |             |                                | ✓                    |               |             |                     |                         |               |                 |                               |                       |   |   |
| Förderung von Akzeptanz                                           |                          |                    |                 |            |                        |                                    |                                               |                        |                               |                         |             |                                | ✓                    |               |             |                     |                         |               |                 |                               |                       |   |   |
| Erfassung von Motiven/Bedürfnissen und Ableitung von Lebenszielen |                          |                    |                 |            |                        |                                    |                                               |                        |                               |                         |             |                                | ✓                    |               |             |                     |                         |               |                 |                               |                       |   |   |
| Tinnituszentrierte Musiktherapie Cramer                           |                          |                    |                 |            |                        |                                    |                                               |                        |                               |                         |             |                                |                      | ✓             |             |                     |                         |               |                 |                               |                       |   |   |
| Tracking Stimmung, Stress, Konzentration                          |                          |                    |                 |            |                        |                                    |                                               |                        |                               |                         |             |                                |                      |               |             | ✓                   |                         |               |                 |                               |                       |   |   |

Interventionselemente aufgeschlüsselt für  $n = 21$  untersuchte Apps. Aus Gründen der Lesbarkeit sind nur Elemente aufgeführt, die für mindestens eine App identifiziert wurden.

**Onlinematerial 4:** Behavior Change Techniques aufgeschlüsselt für die einzelnen Apps.

| Behavior Change Technique (BCT)                   | Relax Noise 3 – Tinnitus | Dr Mollin Tinnitus | Shades of Noise | TinniTrain | Tinnitus Notched Tunes | Tinnitus Relief App. Klangtherapie | White Noise for Sleep. Generator for Tinnitus | Tonal Tinnitus Therapy | Tinnitracks Tinnitus Therapie | ReSound Tinnitus Relief | Tinnitus DE | Widex Zen. Tinnitus Management | Kalmeda Tinnitus-App | tinnitus help | Tinnitus HQ | Track Your Tinnitus | Beltone Tinnitus Calmer | Starkey Relax | Tinnitus Masker | TINNITUS, WHITE NOISE, SCHLAF | UNITI Tinnitus Studie |
|---------------------------------------------------|--------------------------|--------------------|-----------------|------------|------------------------|------------------------------------|-----------------------------------------------|------------------------|-------------------------------|-------------------------|-------------|--------------------------------|----------------------|---------------|-------------|---------------------|-------------------------|---------------|-----------------|-------------------------------|-----------------------|
| 1.1 Goal setting (behavior)                       |                          |                    |                 |            |                        |                                    |                                               |                        |                               | ✓                       |             |                                | ✓                    |               |             |                     | ✓                       |               |                 |                               |                       |
| 1.2 Problem solving                               |                          |                    |                 |            |                        |                                    |                                               |                        |                               |                         |             |                                | ✓                    |               |             |                     |                         |               |                 |                               |                       |
| 1.4 Action planning                               |                          |                    |                 |            |                        |                                    |                                               |                        |                               |                         |             |                                | ✓                    |               |             |                     |                         |               |                 |                               |                       |
| 1.6 Discrepancy between current behavior and goal |                          |                    |                 |            |                        |                                    |                                               |                        |                               |                         |             |                                | ✓                    |               |             |                     |                         |               |                 |                               |                       |
| 1.9 Commitment                                    |                          |                    |                 |            |                        |                                    |                                               |                        |                               |                         |             |                                | ✓                    |               |             |                     |                         |               |                 |                               |                       |
| 2.2 Feedback on behaviour                         |                          |                    | ✓               | ✓          | ✓                      |                                    |                                               | ✓                      | ✓                             | ✓                       | ✓           |                                | ✓                    |               |             |                     | ✓                       |               |                 |                               |                       |
| 2.4 Self-monitoring of outcome(s) of behaviour    |                          |                    | ✓               |            |                        |                                    |                                               |                        |                               |                         |             |                                |                      |               |             | ✓                   |                         |               |                 |                               |                       |
| 2.7 Feedback on outcome(s) of behaviour           |                          |                    |                 |            |                        |                                    |                                               |                        |                               |                         |             |                                | ✓                    |               |             |                     |                         |               |                 |                               |                       |
| 3.1 Social support (unspecified)                  |                          |                    |                 |            |                        |                                    |                                               |                        | ✓                             |                         |             |                                | ✓                    |               |             |                     |                         |               |                 |                               | ✓                     |
| 4.1 Instruction on how to perform the behavior    |                          |                    |                 |            |                        |                                    |                                               |                        | ✓                             | ✓                       |             | ✓                              | ✓                    |               |             |                     | ✓                       |               |                 |                               | ✓                     |
| 4.3 Re-attribution                                |                          |                    |                 |            |                        |                                    |                                               |                        |                               |                         |             |                                | ✓                    |               |             |                     |                         |               |                 |                               |                       |
| 5.4 Monitoring of emotional consequences          |                          |                    |                 |            |                        |                                    |                                               |                        |                               |                         |             |                                | ✓                    |               |             |                     |                         |               |                 |                               |                       |
| 5.6 Information about emotional consequences      |                          |                    |                 |            |                        |                                    |                                               |                        | ✓                             | ✓                       |             | ✓                              |                      |               |             |                     | ✓                       |               |                 |                               | ✓                     |
| 7.1 Prompts/cues                                  |                          |                    |                 |            |                        |                                    |                                               | ✓                      |                               | ✓                       |             |                                | ✓                    |               |             | ✓                   | ✓                       |               |                 |                               | ✓                     |

BCTs aufgeschlüsselt für  $n = 21$  untersuchte Apps. Einsatz der Behavior Change Technique Taxonomy v1 nach Michie et al. 2013. Aus Gründen der Lesbarkeit sind nur BCTs aufgeführt, die für mindestens eine App identifiziert wurden.

Fortsetzung **Onlinematerial 4:** Behavior Change Techniques aufgeschlüsselt für die einzelnen Apps.

| Behavior Change Technique (BCT)    | Relax Noise 3 – Tinnitus | Dr Mollin Tinnitus | Shades of Noise | TinniTrain | Tinnitus Notched Tunes | Tinnitus Relief App. Klangtherapie | White Noise for Sleep. Generator for Tinnitus | Tonal Tinnitus Therapy | Tinnitracks Tinnitus Therapie | ReSound Tinnitus Relief | Tinnitus DE | Widex Zen. Tinnitus Management | Kalmeda Tinnitus-App | tinnitus help | Tinnitus HQ | Track Your Tinnitus | Beltone Tinnitus Calmer | Starkey Relax | Tinnitus Masker | TINNITUS, WHITE NOISE, SCHLAF | UNITI Tinnitus Studie |
|------------------------------------|--------------------------|--------------------|-----------------|------------|------------------------|------------------------------------|-----------------------------------------------|------------------------|-------------------------------|-------------------------|-------------|--------------------------------|----------------------|---------------|-------------|---------------------|-------------------------|---------------|-----------------|-------------------------------|-----------------------|
| 7.7 Exposure                       |                          |                    |                 |            |                        |                                    |                                               |                        |                               |                         |             |                                | ✓                    |               |             |                     |                         |               |                 |                               |                       |
| 7.8 Associative learning           |                          |                    |                 |            |                        |                                    |                                               |                        |                               |                         |             |                                | ✓                    |               |             |                     |                         |               |                 |                               |                       |
| 8.1 Behavioral practice/ rehearsal |                          |                    | ✓               |            |                        |                                    |                                               |                        | ✓                             | ✓                       |             | ✓                              | ✓                    |               |             |                     | ✓                       |               |                 |                               |                       |
| 10.3 Non-specific reward           |                          |                    |                 |            |                        |                                    |                                               |                        | ✓                             |                         |             |                                |                      |               |             |                     |                         |               |                 |                               |                       |
| 10.6 Non-specific incentive        |                          |                    |                 |            |                        |                                    |                                               |                        | ✓                             |                         |             |                                |                      |               |             |                     |                         |               |                 |                               |                       |
| 10.9 Self-reward                   |                          |                    |                 |            |                        |                                    |                                               |                        | ✓                             |                         |             |                                |                      |               |             |                     |                         |               |                 |                               |                       |
| 11.2 Reduce negative emotions      |                          |                    |                 |            |                        |                                    |                                               |                        | ✓                             |                         |             |                                |                      |               |             |                     |                         |               |                 |                               |                       |
| 13.2 Framing/reframing             |                          |                    |                 |            |                        |                                    |                                               |                        | ✓                             | ✓                       |             |                                | ✓                    |               |             |                     | ✓                       |               |                 |                               |                       |
| 13.4 Valued self-identity          |                          |                    |                 |            |                        |                                    |                                               |                        |                               |                         |             |                                | ✓                    |               |             |                     |                         |               |                 |                               |                       |
| 15.3 Focus on past success         |                          |                    |                 |            |                        |                                    |                                               |                        |                               |                         |             |                                | ✓                    |               |             |                     |                         |               |                 |                               |                       |

BCTs aufgeschlüsselt für  $n = 21$  untersuchte Apps. Einsatz der Behavior Change Technique Taxonomy v1 nach Michie et al. 2013. Aus Gründen der Lesebarkeit sind nur BCTs aufgeführt, die für mindestens eine App identifiziert wurden.
